# Supplementary material for: Dietary Lactobacillus johnsonii-derived extracellular vesicles ameliorate acute colitis by regulating gut microbiota and maintaining intestinal barrier homeostasis
Source: Royal Society of Chemistry journal article supplement (doi:10.1039/d4fo04194a), 2024-01-01
Supplement: d4fo04194a1.pdf [file d4fo04194a1.pdf]

1

## Supporting Information

2 **Dietary *Lactobacillus johnsonii*-derived extracellular vesicles ameliorate**  
3 **acute colitis by regulating gut microbiota and maintaining intestinal**  
4 **barrier homeostasis**

5 Zhiguo Li <sup>a</sup>, Mengyu Li <sup>b</sup>, Xuexun Fang <sup>b</sup>, Dahai Yu <sup>b</sup>, Xin Hu <sup>a, \*</sup>

6 <sup>a</sup> China-Japan Union Hospital of Jilin University, Jilin University, Changchun, China 130033,  
7 P. R. China

8 <sup>b</sup> Key Laboratory for Molecular Enzymology and Engineering of Ministry of Education,  
9 School of Life Sciences, Jilin University, 2699 Qianjin Street, Changchun, 130012, P. R.  
10 China. Tel: +86-431-85155249; Fax +86-431-85155200

11 \* Corresponding author

12 E-mail addresses: huxin@jlu.edu.cn (X. Hu)

- 
- 13 **Table S1.** Primer sequences used in the real-time PCR.
- 14 **Table S2.** The relative abundance of differentially expressed metabolites.
- 15 **Table S3.** The complete results of differential metabolite KEGG functional annotation.
- 16 **Fig. S1.** Daily changes in diarrhea (A) and hematochezia (B) in mice during the experiment.
- 17 **Fig. S2.** Daily changes in diarrhea (A) and hematochezia (B) in mice after LJ-EVs  
18 intervention.
- 19 **Fig. S3.** (A) Effect of LJ-EVs administration on the gut microbiome composition in DSS-  
20 induced colitis mice at the species level. (B) The specific gravity and relationship of different  
21 species in the sample are displayed through a ternary phase diagram.
- 22 **Fig. S4.** (A) Principal component analysis (PCA) of metabolites between groups. (B) Cluster  
23 heatmap of differentially expressed metabolites. (C) The top 10 metabolites with differences  
24 between groups.
- 25 **Fig. S5.** Western blot raw images.

---

26 **Table S1.** Primer sequences used in the real-time PCR.

---

| <b>Gene</b> | <b>Accession number</b> | <b>Primer sequence (5'–3')</b>                      |
|-------------|-------------------------|-----------------------------------------------------|
| ZO-1        | XM_036152893.1          | F: ACCTCTGCAGCAATAAAGCAG<br>R: GAAATCGTGCTGATGTGCCA |
| Occludin    | NM_001360536.1          | F: TTCAGGTGAATGGGTCACCG<br>R: AGATAAGCGAACCTGCCGAG  |

---

27

---

28 **Table S2.** The relative abundance of differentially expressed metabolites.

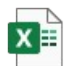

Table S2.xlsx

29

---

30 **Table S3.** The complete results of differential metabolite KEGG functional annotation.

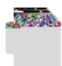

Table S3.xlsx

31

A

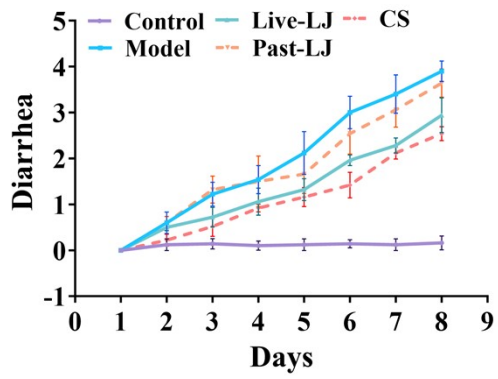

B

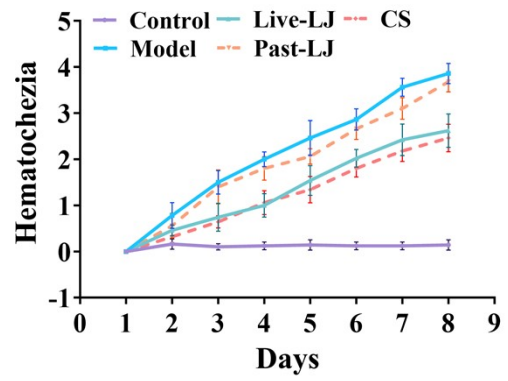

32

33 **Fig. S1.** Daily changes in diarrhea (A) and hematochezia (B) in mice during the experiment.

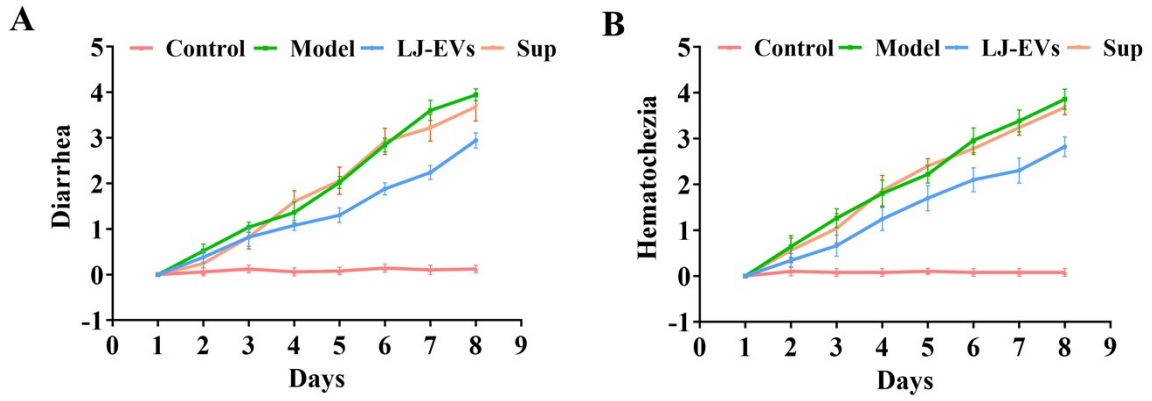

34

35 **Fig. S2.** Daily changes in diarrhea (A) and hematochezia (B) in mice after LJ-EVs and  
36 supernatant of *L. johnsonii* culture with EVs removed intervention.

**A**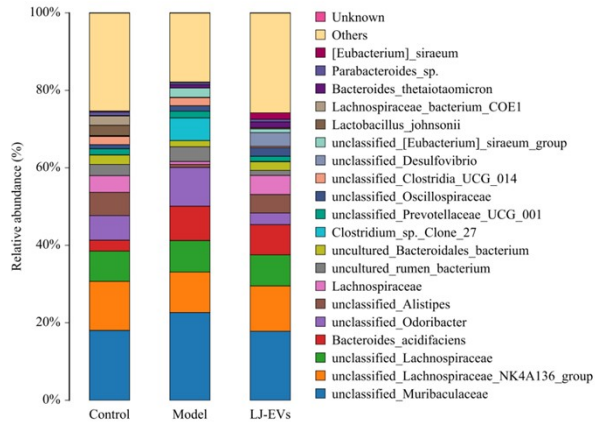**B**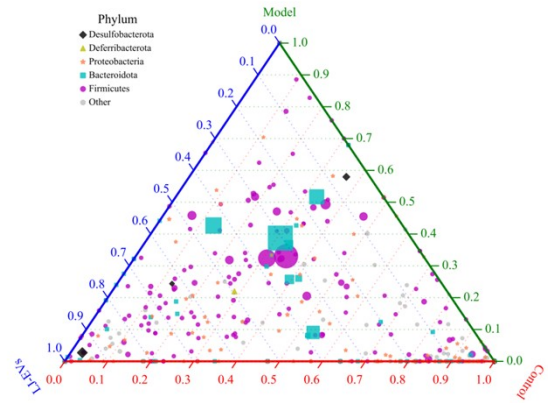

37

38 **Fig. S3.** (A) Effect of LJ-EVs administration on the gut microbiome composition in DSS-  
 39 induced colitis mice at the species level. (B) The specific gravity and relationship of different  
 40 species in the sample are displayed through a ternary phase diagram.



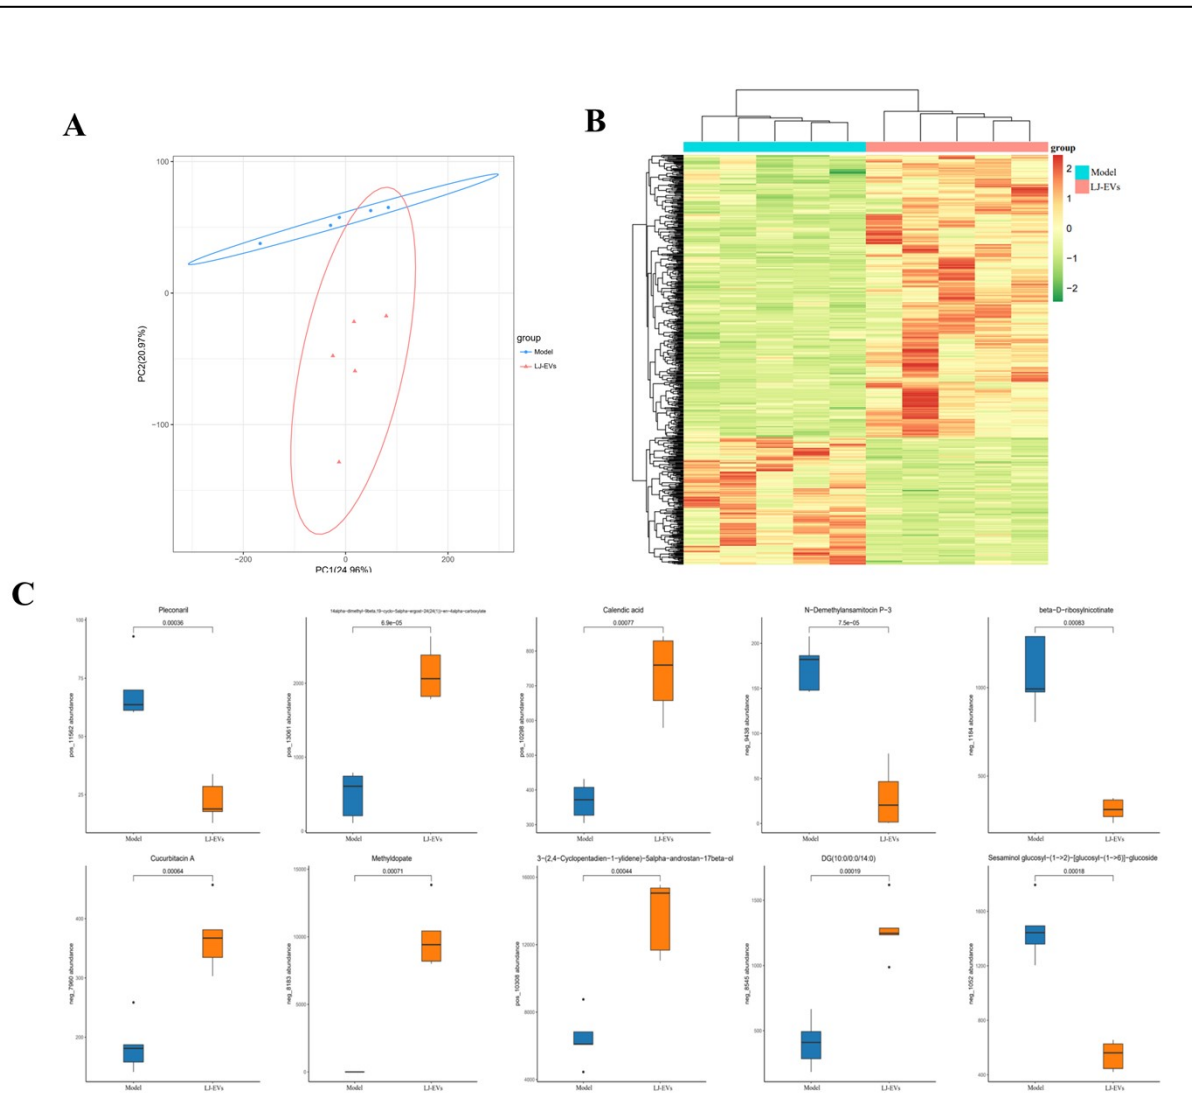

41

42 **Fig. S4.** (A) Principal component analysis (PCA) of metabolites between groups. (B) Cluster  
 43 heatmap of differentially expressed metabolites. (C) The top 10 metabolites with differences  
 44 between groups.

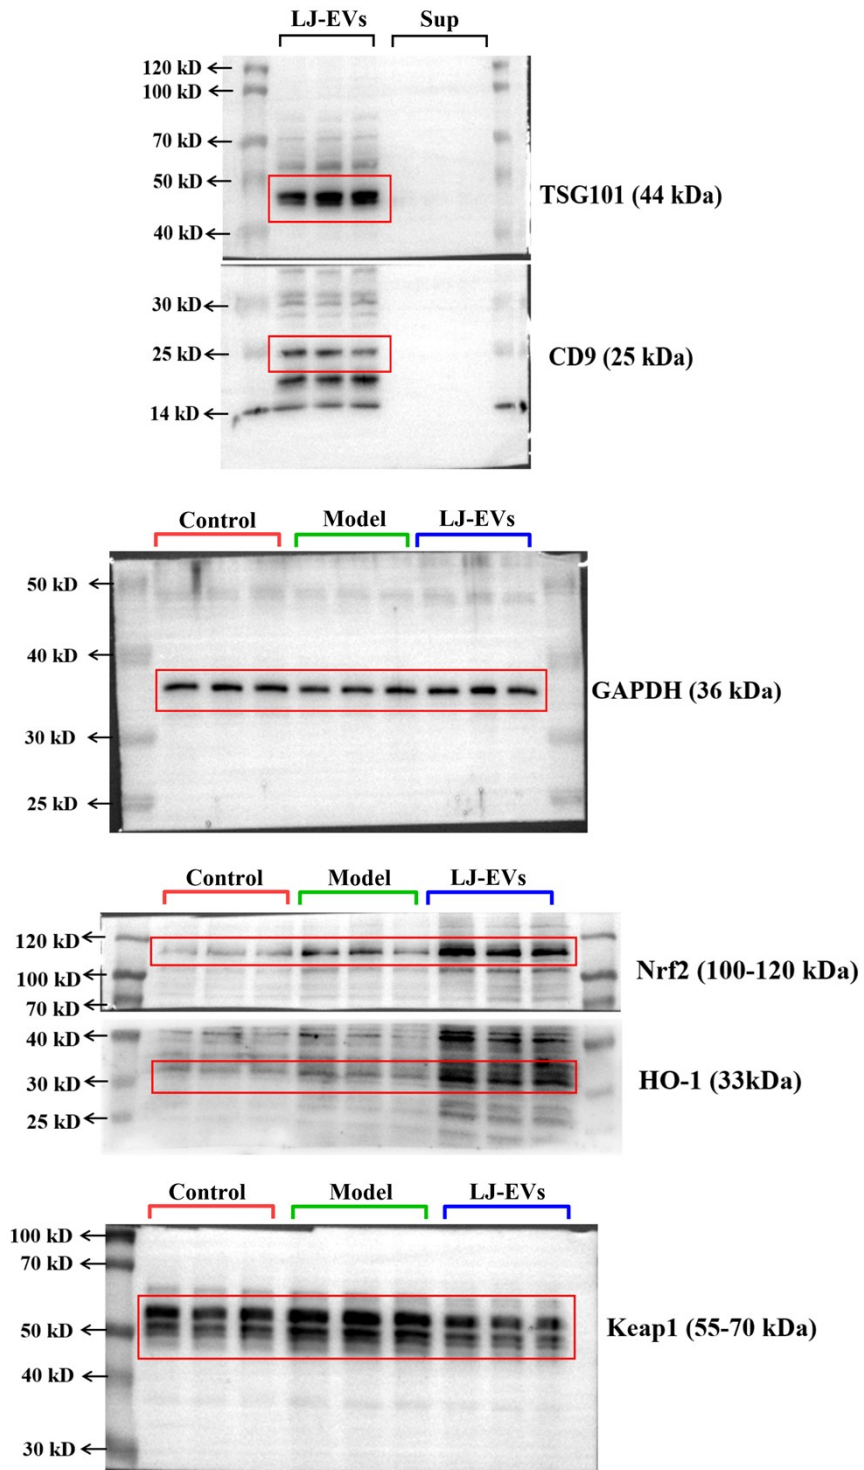

45  
 46 **Fig. S5.** Western blot raw images.
